# Supplementary material for: Adverse outcomes in COVID-19 and diabetes: a retrospective cohort study from three London teaching hospitals
Source: PubMed Central journal article supplement (PMC7789097; doi:10.1136/bmjdrc-2020-001858), 2021-01-06
Supplement: bmjdrc-2020-001858supp001.pdf [file bmjdrc-2020-001858supp001.pdf]

## 1 Supplementary Methods

### 2 STATISTICAL ANALYSES

3 Multiple logistic regression was chosen as the natural approach to model the  
4 probability of a binary outcome (death or ICU admission within 30 days of diagnosis).  
5 To neutralise the effects of extreme values all continuous variables were winsorized,  
6 at the 99% level in the case of the regression on all patients and at 97% in the case  
7 of the cohort of patients with diabetes (given their reduced sample size). We ran the  
8 first regression including all the potentially relevant predictors to avoid the problem of  
9 omitted variable bias. Estimated coefficients can be inconsistent if a relevant  
10 regressor is selected out of the model. Unlike in linear models, estimated coefficients  
11 in logistic regressions cannot be interpreted as marginal effects. The latter can be  
12 calculated alongside their standard errors. For example, the marginal effect of a  
13 generic regressor  $X_i$  measures the expected change on  $Pr$  (primary outcome  
14 measure) after a unit increase of  $X_i$ , holding all other  $X$ s at their sample averages.

15 To enhance the interpretability and select the truly significant variables in our  
16 regression model, we have resorted to a regularised regression, which solves a  
17 general problem of the type:

$$\min_{\beta_0, \beta} \left( \frac{1}{2n} \sum_{i=1}^n (y_i - \beta_0 - x_i^\top \beta)^2 + \sum_{j=1}^p p_\lambda (|\beta_j|) \right)$$

18

19 where  $y_i$  is the response variable,  $x_i$  is the vector of  $p$  predictors,  $n$  is the number of  
20 observations and the  $\beta$ s are the parameters to estimate. The main difference  
21 between Lasso and the standard minimization involved in least squares regressions  
22 is the presence of the “penalty”  $\lambda \sum_{j=1}^p |\beta_j|$ , where  $\lambda$  is a non-negative tuning  
23 parameter. This penalty reduces the number of regressors and, therefore, serves the  
24 purpose of regularizing the problem and selecting the important predictors at the  
25 same time.

26 One of the first examples of regularized regression techniques is LASSO,  
27 popularized in the statistical literature by Tibshirani [1] and used in medical  
28 statistics.[2, 3] In many empirically relevant scenarios, the LASSO has been shown  
29 to perform better than stepwise selection methods.[4] In this paper we have resorted

30 to the SCAD penalty proposed by Fan et al.,[5] which has two important advantages:  
31 1. It doesn't penalize large coefficients; 2. It allows at the same time variable  
32 selection, estimation and inference, hence avoiding the need to re-estimate the  
33 model after selecting the relevant important predictors and controlling the errors  
34 involved in variable selection, in contrast to stepwise methods.

35 The penalty function in this model is defined by:

36

$$p'_{\lambda} (|\beta|) = \lambda \left\{ I (|\beta| \leq \lambda) = \frac{(a\lambda - |\beta|)_+}{(a-1)\lambda} I (|\beta| > \lambda) \right\}$$

37

38

39 The choice of  $\lambda$  is crucial for the performance of the methodology. As  $\lambda$  increases,  
40 the number of nonzero components in the vector  $\beta$  decreases. To avoid the danger  
41 of overfitting, we have used a tenfold cross validation technique to select  $\lambda$ .

42 Supplementary Tables

43 SUPPLEMENTARY TABLE S1 – Demographic and Clinical Features of 889 Patients  
 44 Treated for COVID-19 Patients in ICHNT Between March and April 2020 (Univariate  
 45 Analysis for primary outcome of death or Intensive Care Unit admission within 30  
 46 days of swab positive diagnosis).

| <b>WHOLE COHORT</b>     |                   |                                     |                       |                                                  |                                     |                   |
|-------------------------|-------------------|-------------------------------------|-----------------------|--------------------------------------------------|-------------------------------------|-------------------|
| <i>Clinical feature</i> |                   | <i>Number of patients with data</i> | <i>Prevalence (n)</i> | <i>Odds ratio of primary outcome (OR)</i>        | <i>95% confidence interval (CI)</i> | <i>p-value</i>    |
| Female                  |                   | 889                                 | 40% (355)             | 0.69                                             | 0.52 to 0.91                        | <b>0.01</b>       |
| Age (years)             |                   | 889                                 |                       |                                                  |                                     |                   |
|                         | 18-49             |                                     | 18% (164)             | 0.40                                             | 0.24 to 0.67                        | <b>&lt;0.0001</b> |
|                         | 50-59             |                                     | 18% (157)             | 1                                                | REFERENCE                           |                   |
|                         | 60-69             |                                     | 17% (147)             | 1.11                                             | 0.74 to 1.84                        | 0.55              |
|                         | 70-79             |                                     | 22% (193)             | 1.33                                             | 0.86 to 2.03                        | 0.23              |
|                         | >80               |                                     | 26% (228)             | 1.41                                             | 0.92 to 2.15                        | 0.21              |
| Weight (kg)             |                   | 693                                 |                       |                                                  |                                     |                   |
|                         | <60               |                                     | 19% (134)             | 1.83                                             | 1.48 to 2.26                        | <b>&lt;0.0001</b> |
|                         | 60-90             |                                     | 58% (399)             | 1                                                | REFERENCE                           |                   |
|                         | >90               |                                     | 23% (160)             | 1.02                                             | 0.88 to 1.09                        | 0.77              |
| Ethnicity               |                   | 865                                 |                       |                                                  |                                     |                   |
|                         | White             |                                     | 38% (327)             | 1                                                | REFERENCE                           |                   |
|                         | Black             |                                     | 17% (146)             | 1.21                                             | 0.81 to 1.81                        | 0.40              |
|                         | South Asian       |                                     | 11% (97)              | 1.04                                             | 0.64 to 1.66                        | >0.9              |
|                         | All non-White     |                                     | 62% (538)             | 1.35                                             | 1.01 to 1.81                        | <b>0.04</b>       |
| Smoking status          |                   | 484                                 |                       |                                                  |                                     |                   |
|                         | Current/ex-smoker |                                     | 189                   | 1                                                | REFERENCE                           |                   |
|                         | Never smoked      |                                     | 295                   | 1.38                                             | 0.93 to 2.03                        | 0.11              |
| Co-morbidities          |                   | 889                                 |                       | <i>OR (co-morbidity vs without co-morbidity)</i> |                                     |                   |
|                         | Hypertension      |                                     | 47% (418)             | 2.41                                             | 1.82 to 3.20                        | <b>&lt;0.001</b>  |
|                         | Diabetes          |                                     | 38% (337)             | 1.68                                             | 1.27 to 2.21                        | <b>&lt;0.001</b>  |
|                         | Hyperlipidaemia   |                                     | 33% (296)             | 1.56                                             | 1.16 to 2.08                        | <b>0.04</b>       |
|                         | Ischaemic heart   |                                     | 16% (144)             | 2.25                                             | 1.58 to 3.23                        | <b>&lt;0.001</b>  |

|                                                |                                 |     |           |                                                                      |              |                   |
|------------------------------------------------|---------------------------------|-----|-----------|----------------------------------------------------------------------|--------------|-------------------|
|                                                | disease                         |     |           |                                                                      |              |                   |
|                                                | Stroke                          |     | 13% (120) | 0.98                                                                 | 0.66 to 1.46 | >0.9              |
|                                                | Heart failure                   |     | 10% (87)  | 2.49                                                                 | 1.60 to 3.85 | <b>&lt;0.001</b>  |
|                                                | COPD                            |     | 9% (80)   | 1.12                                                                 | 0.71 to 1.81 | 0.63              |
|                                                | Active cancer                   |     | 9% (79)   | 1.15                                                                 | 0.72 to 1.86 | 0.62              |
|                                                | Pre-COVID-19 eGFR <60mL/kg/min  | 694 |           | 1.40                                                                 | 1.25 to 1.56 | <b>&lt;0.001</b>  |
|                                                |                                 |     |           |                                                                      |              |                   |
| Pre-admission medications                      |                                 | 889 |           | <i>OR (taking specified medication vs not taking the medication)</i> |              |                   |
|                                                | Statin                          |     | 42% (373) | 1.49                                                                 | 1.13 to 1.97 | <b>0.006</b>      |
|                                                | Anti-platelet drug              |     | 23% (204) |                                                                      | 0.92 to 1.75 | 0.14              |
|                                                | ACE inhibitor                   |     | 17% (151) | 1.57                                                                 | 1.10 to 2.23 | <b>0.013</b>      |
|                                                | Angiotensin II receptor blocker |     | 13% (116) | 1.43                                                                 | 0.95 to 2.12 | 0.09              |
|                                                |                                 |     |           |                                                                      |              |                   |
| CFS Score (1-9)                                |                                 | 756 |           |                                                                      |              |                   |
|                                                | 1 - 2                           |     | 40% (300) | 1                                                                    | REFERENCE    |                   |
|                                                | 3 - 4                           |     | 32% (242) | 1.50                                                                 | 1.05 to 2.15 | <b>0.03</b>       |
|                                                | 5 - 6                           |     | 15% (110) | 1.75                                                                 | 1.20 to 2.52 | <b>0.003</b>      |
|                                                | ≥7                              |     | 13% (104) | 2.34                                                                 | 1.46 to 3.75 | <b>0.0004</b>     |
|                                                |                                 |     |           |                                                                      |              |                   |
| eGFR at time of COVID-19 diagnosis (mL/kg/min) |                                 | 880 |           |                                                                      |              |                   |
|                                                | >90                             |     | 27% (240) | 1                                                                    | REFERENCE    |                   |
|                                                | 60 - 90                         |     | 31% (269) | 1.60                                                                 | 1.06 to 2.41 | <b>0.02</b>       |
|                                                | 45 - 59                         |     | 11% (95)  | 2.35                                                                 | 1.40 to 3.91 | <b>0.001</b>      |
|                                                | 30 - 44                         |     | 10% (93)  | 4.28                                                                 | 2.60 to 7.21 | <b>&lt;0.0001</b> |
|                                                | 15 - 29                         |     | 9% (78)   | 3.02                                                                 | 1.78 to 5.16 | <b>&lt;0.0001</b> |
|                                                | <15                             |     | 12% (105) | 4.19                                                                 | 2.56 to 6.78 | <b>&lt;0.0001</b> |
|                                                |                                 |     |           |                                                                      |              |                   |
| Glucose at time of COVID-19 diagnosis          |                                 | 652 |           |                                                                      |              |                   |
| <i>WHOLE COHORT</i>                            | <10 mmol/L                      |     | 78% (508) | 1                                                                    | REFERENCE    |                   |
|                                                | ≥10 mmol/L                      |     | 22% (144) | 2.04                                                                 | 1.39 to 2.95 | <b>0.0002</b>     |
|                                                |                                 | 394 |           |                                                                      |              |                   |

|                                 |            |  |           |      |              |               |
|---------------------------------|------------|--|-----------|------|--------------|---------------|
| PATIENTS<br>WITHOUT<br>DIABETES | <10 mmol/L |  | 94% (369) | 1    | REFERENCE    |               |
|                                 | ≥10 mmol/L |  | 6% (25)   | 3.56 | 1.60 to 8.62 | <b>0.004*</b> |

47 Supplementary Table S1: 889 patients with confirmed (swab positive) COVID-19  
 48 were analysed and univariate odds ratios (OR) against a defined comparator  
 49 (REFERENCE) are provided for our predefined primary outcome of death or ICU  
 50 admission within 30 days of diagnosis. ACE inhibitor = angiotensin converting  
 51 enzyme inhibitor, CBG = capillary blood glucose, CFS = Clinical Frailty Scale, COPD  
 52 = Chronic obstructive pulmonary disease, DPPIV inhibitor = dipeptidyl peptidase-IV  
 53 inhibitor, eGFR = estimated glomerular filtration rate, GLP-1RA = glucagon-like  
 54 peptide-1 receptor agonist, HbA1c = glycated haemoglobin, SGLT2 inhibitor =  
 55 sodium-glucose co-transporter-2 inhibitor. Significant p-values for odds ratios using  
 56 Fishers' exact test are shown in **bold**. \*Survives correction for age and gender.

57 SUPPLEMENTARY TABLE S2 – Demographic and Clinical Features of 337 Patients  
 58 with Diabetes Mellitus treated for COVID-19 in ICHNT Between March and April  
 59 2020 (Univariate Analysis for primary outcome of death or Intensive Care Unit  
 60 admission within 30 days of swab positive diagnosis).

| PATIENTS WITH DIABETES                            |                                      |     |           |                                                                      |              |               |
|---------------------------------------------------|--------------------------------------|-----|-----------|----------------------------------------------------------------------|--------------|---------------|
| Diabetes diagnosis                                |                                      | 889 |           |                                                                      |              |               |
|                                                   | Patients without diabetes            |     | 62% (552) | 1                                                                    | REFERENCE    |               |
|                                                   | Patients with diabetes               |     | 38% (337) | 1.68                                                                 | 1.27 to 2.12 | <b>0.0003</b> |
| Type of diabetes                                  |                                      | 337 |           |                                                                      |              |               |
|                                                   | Type 2                               |     | 96% (324) | 1                                                                    | REFERENCE    |               |
|                                                   | Type 1                               |     | 4% (13)   | 0.37                                                                 | 0.11 to 1.27 | 0.16          |
| Duration of diabetes                              |                                      | 189 |           |                                                                      |              |               |
|                                                   | <10 years                            |     | 47% (88)  | 1                                                                    | REFERENCE    |               |
|                                                   | ≥10 years                            |     | 53% (101) | 1.82                                                                 | 1.03 to 3.34 | 0.054         |
| Diabetes medication at time of COVID-19 diagnosis |                                      | 337 |           | <i>OR (taking specified medication vs not taking the medication)</i> |              |               |
|                                                   | Insulin                              |     | 31% (108) | 0.88                                                                 | 0.55 to 1.42 | 0.64          |
|                                                   | GLP-1RA                              |     | 1% (5)    | 0.52                                                                 | 0.09 to 2.60 | 0.66          |
|                                                   | Metformin                            |     | 49% (169) | 1.14                                                                 | 0.74 to 1.76 | 0.58          |
|                                                   | Sulphonylurea                        |     | 22% (74)  | 0.85                                                                 | 0.50 to 1.45 | 0.59          |
|                                                   | SGLT2 inhibitor                      |     | 7% (24)   | 0.66                                                                 | 0.30 to 1.52 | 0.40          |
|                                                   | DPPIV inhibitor                      |     | 27% (93)  | 1.27                                                                 | 0.79 to 2.05 | 0.39          |
|                                                   | Total number of diabetes medications |     |           |                                                                      |              |               |
|                                                   | 0                                    |     | 18% (57)  | 1                                                                    | REFERENCE    |               |
|                                                   | 1                                    |     | 41% (139) | 0.91                                                                 | 0.50 to 1.67 | 0.75          |
|                                                   | 2                                    |     | 28% (96)  | 0.97                                                                 | 0.49 to 1.83 | >0.9          |
|                                                   | ≥3                                   |     | 13% (45)  | 0.95                                                                 | 0.42 to 2.13 | >0.9          |
| HbA1c                                             |                                      | 240 |           |                                                                      |              |               |
|                                                   | <58 mmol/mol                         |     | 47% (112) | 1                                                                    | REFERENCE    |               |
|                                                   | ≥58 mmol/mol                         |     | 53% (128) | 1.44                                                                 | 0.85 to 2.39 | 0.19          |
| Glucose at time of                                |                                      | 323 |           |                                                                      |              |               |

|                                                              |                      |     |           |      |              |              |
|--------------------------------------------------------------|----------------------|-----|-----------|------|--------------|--------------|
| COVID-19 diagnosis                                           |                      |     |           |      |              |              |
|                                                              | <10 mmol/L           |     | 56% (181) | 1    | REFERENCE    |              |
|                                                              | ≥10 mmol/L           |     | 44% (142) | 1.65 | 1.07 to 2.56 | <b>0.03</b>  |
| Average CBG in 1 <sup>st</sup> 72hr after COVID-19 diagnosis |                      | 306 |           |      |              |              |
|                                                              | <10 mmol/L           |     | 64% (197) | 1    | REFERENCE    |              |
|                                                              | ≥10 mmol/L           |     | 36% (109) | 1.93 | 1.22 to 3.11 | <b>0.008</b> |
| Interaction of Diabetes with IHD                             |                      | 337 |           |      |              |              |
|                                                              | Without IHD          |     | 73% (246) | 1    | REFERENCE    |              |
|                                                              | With IHD             |     | 27% (91)  | 1.18 | 1.03 to 1.37 | <b>0.02</b>  |
| Interaction of Diabetes with pre-COVID-19 eGFR (mL/kg/min)   |                      | 337 |           |      |              |              |
|                                                              | eGFR >80             |     | 24% (82)  | 1    | REFERENCE    |              |
|                                                              | eGFR ≤79             |     | 76% (255) | 1.53 | 1.03 to 2.29 | <b>0.04</b>  |
| Interaction of Diabetes with Hypertension                    |                      | 337 |           |      |              |              |
|                                                              | Without hypertension |     | 29% (99)  | 1    | REFERENCE    |              |
|                                                              | With hypertension    |     | 71% (238) | 1.12 | 0.80 to 1.58 | 0.54         |

61 Supplementary Table S2: Out of the 889 patients studied in total (see Table S1), this  
62 table shows the results for the 337 patients within that group who also had a  
63 diagnosis of Diabetes Mellitus (DM). Patients with confirmed (swab positive)  
64 COVID-19 were analysed and univariate odds ratios (OR) against a defined  
65 comparator (REFERENCE) are provided for our predefined primary outcome of  
66 death or ICU admission within 30 days of diagnosis. ACE inhibitor = angiotensin  
67 converting enzyme inhibitor, CBG = capillary blood glucose, DPPIV inhibitor =  
68 dipeptidyl peptidase-IV inhibitor, eGFR = estimated glomerular filtration rate, IHD =  
69 ischaemic heart disease. Significant p-values for odds ratios using Fishers' exact  
70 test are shown in **bold**.

71 SUPPLEMENTARY TABLE S3 - Biochemical Measurements and Clinical  
 72 Observations for 889 patients admitted with COVID-19 according to whether they met  
 73 the primary outcome of death or Intensive Care Unit admission within 30 days of  
 74 swab positive diagnosis.

|                                      | Measurement at time of diagnosis                | Primary outcome (died/ICU admission within 30 days) |        |        | Survived/no ICU admission |       |         | p-value (primary outcome vs survived/no ICU) |
|--------------------------------------|-------------------------------------------------|-----------------------------------------------------|--------|--------|---------------------------|-------|---------|----------------------------------------------|
|                                      |                                                 | n                                                   | mean   | SD     | n                         | mean  | SD      |                                              |
| Arterial Blood Gas (ABG) measurement | FiO <sub>2</sub> recorded on ABG                | 260                                                 | 48.70  | 26.68  | 403                       | 29.81 | 18.2    | <0.0001                                      |
|                                      | Lactate (mmol/L)                                | 260                                                 | 1.83   | 1.78   | 403                       | 1.536 | 1.028   | 0.0077                                       |
|                                      | pCO <sub>2</sub> (kPa)                          | 258                                                 | 4.93   | 1.36   | 402                       | 5.078 | 2.746   | 0.4618                                       |
|                                      | pO <sub>2</sub> (kPa)                           | 255                                                 | 8.81   | 5.97   | 397                       | 8.208 | 5.596   | 0.1448                                       |
|                                      | Base excess (mmol/L)                            | 256                                                 | -0.41  | 17.52  | 397                       | -0.37 | 4.953   | 0.1049                                       |
|                                      | pH                                              | 259                                                 | 7.41   | 0.097  | 401                       | 7.421 | 0.08202 | 0.222                                        |
|                                      | Bicarbonate (mmol/L)                            | 256                                                 | 23.28  | 5.69   | 400                       | 24.05 | 4.415   | 0.0962                                       |
| Laboratory results                   | WCC (x10 <sup>9</sup> /L)                       | 320                                                 | 8.61   | 4.09   | 561                       | 7.95  | 4.635   | 0.0015                                       |
|                                      | Hb (g/L)                                        | 320                                                 | 125.70 | 23.15  | 562                       | 129.3 | 20.96   | 0.0264                                       |
|                                      | Platelet count (x10 <sup>9</sup> /L)            | 319                                                 | 218.20 | 104.70 | 562                       | 238.4 | 105.5   | 0.0024                                       |
|                                      | Neutrophils (x10 <sup>9</sup> /L)               | 318                                                 | 7.42   | 7.22   | 562                       | 6.346 | 8.549   | <0.0001                                      |
|                                      | Lymphocytes (x10 <sup>9</sup> /L)               | 317                                                 | 0.98   | 0.997  | 562                       | 1.219 | 1.206   | <0.0001                                      |
|                                      | D-dimers (ng/ml)                                | 221                                                 | 3895   | 5292   | 332                       | 2445  | 3671    | <0.0001                                      |
|                                      | Ferritin (ng/mL)                                | 233                                                 | 2122   | 5214   | 358                       | 1313  | 1824    | <0.0001                                      |
|                                      | Na (mmol/L)                                     | 320                                                 | 138.30 | 6.231  | 560                       | 137   | 7.424   | 0.043                                        |
|                                      | K (mmol/L)                                      | 309                                                 | 4.33   | 0.75   | 534                       | 4.213 | 0.5569  | 0.0783                                       |
|                                      | eGFR (mL/min)                                   | 319                                                 | 51.14  | 29.67  | 560                       | 65.66 | 27.47   | <0.0001                                      |
|                                      | eGFR pre-COVID19 baseline (mL/min)              | 236                                                 | 60.38  | 29.93  | 457                       | 72.64 | 46.48   | <0.0001                                      |
|                                      | ALT (U/L)                                       | 295                                                 | 53.08  | 155.10 | 515                       | 39.28 | 57.06   | 0.6581                                       |
|                                      | CRP (mg/L)                                      | 314                                                 | 156.9  | 104.40 | 542                       | 94.33 | 88.34   | <0.0001                                      |
|                                      | CK (U/L)                                        | 206                                                 | 641.9  | 1184   | 311                       | 391.8 | 1179    | <0.0001                                      |
|                                      | LDH (U/L)                                       | 186                                                 | 602.5  | 626    | 291                       | 398.8 | 230.2   | <0.0001                                      |
|                                      | BNP (pg/mL)                                     | 184                                                 | 423.1  | 1451   | 267                       | 192.2 | 762.7   | <0.0001                                      |
| Procalcitonin (ng/mL)                | 33                                              | 20.5                                                | 69.04  | 49     | 0.538                     | 1.527 | <0.0001 |                                              |
| HbA1c - most recent (mmol/mol)       | 160                                             | 54.18                                               | 20.28  | 274    | 53.27                     | 21.22 | 0.4003  |                                              |
| Glucose                              | CBG – at time of COVID19 diagnosis              | 269                                                 | 10.04  | 5.54   | 416                       | 8.312 | 5.398   | <0.0001                                      |
|                                      | Average CBG in first 72hr of COVID-19 diagnosis | 244                                                 | 9.256  | 3.59   | 332                       | 7.795 | 3.187   | <0.0001                                      |
| Clinical observations at             | Temperature (°C)                                | 311                                                 | 37.38  | 1.19   | 558                       | 37.26 | 1.016   | 0.0441                                       |



|           |                                       |     |       |       |     |       |       |                   |
|-----------|---------------------------------------|-----|-------|-------|-----|-------|-------|-------------------|
| diagnosis | Respiratory Rate (Breaths per minute) | 312 | 25.54 | 8.82  | 556 | 22.03 | 6.049 | <b>&lt;0.0001</b> |
|           | Heart Rate (beats per minute)         | 314 | 95.91 | 20.34 | 558 | 92.42 | 18.37 | <b>0.0093</b>     |
|           | Systolic BP (mmHg)                    | 316 | 134.8 | 27.49 | 560 | 131.2 | 23.74 | <b>0.0452</b>     |
|           | Diastolic BP (mmHg)                   | 316 | 73.53 | 16.06 | 559 | 75.67 | 13.81 | <b>0.0321</b>     |
|           | NEWS at arrival                       | 300 | 6     | 3.44  | 540 | 4.05  | 3.642 | <b>&lt;0.0001</b> |

75 Supplementary Table S3: Unadjusted comparisons are shown for patients who met  
76 the primary outcome (death or ICU admission within 30 days of diagnosis) against  
77 those who survived and did not have an ICU admission: n = number of patients for  
78 whom that data set is available. Note the total number of patients arriving at the  
79 primary outcome was 323. ABG = arterial blood gas, ALT = alanine  
80 aminotransferase, BNP = brain natriuretic peptide, BP = blood pressure, CBG =  
81 capillary blood glucose, CRP = C-reactive protein, CK = creatinine kinase, eGFR =  
82 estimated glomerular filtration rate, FiO2 = fraction of inspired oxygen, Hb =  
83 haemoglobin, HbA1c = glycated haemoglobin, K = potassium, LDH = lactate  
84 dehydrogenase, Na = sodium, NEWS = National Early Warning Score, WCC = white  
85 cell count.

86 SUPPLEMENTARY TABLE S4 - Biochemical Measurements and Clinical  
 87 Observations for 889 patients admitted with COVID-19 according to whether or not  
 88 they had a pre-existing diagnosis of Diabetes Mellitus

|                                      | Measurement at time of diagnosis                | Patients without diabetes mellitus (no DM) |        |        | Patients with diabetes mellitus (DM) |        |                   | p-value (no DM vs DM) |
|--------------------------------------|-------------------------------------------------|--------------------------------------------|--------|--------|--------------------------------------|--------|-------------------|-----------------------|
|                                      |                                                 | n                                          | mean   | SD     | n                                    | mean   | SD                |                       |
| Arterial Blood Gas (ABG) measurement | FiO2 recorded on ABG                            | 403                                        | 36.4   | 23.2   | 260                                  | 38.51  | 24.64             | 0.2867                |
|                                      | Lactate (mmol/L)                                | 402                                        | 1.58   | 1.4    | 261                                  | 1.765  | 1.347             | <b>0.0031</b>         |
|                                      | pCO2 (kPa)                                      | 401                                        | 4.96   | 1.28   | 259                                  | 5.117  | 3.321             | 0.8276                |
|                                      | pO2 (kPa)                                       | 397                                        | 8.27   | 5.45   | 255                                  | 8.71   | 6.183             | 0.5349                |
|                                      | Base excess (mmol/L)                            | 397                                        | 0.0348 | 5.05   | 256                                  | -2.048 | 6.781             | <b>0.0003</b>         |
|                                      | pH                                              | 401                                        | 7.43   | 0.0813 | 259                                  | 7.401  | 0.09645           | <b>0.001</b>          |
|                                      | Bicarbonate (mmol/L)                            | 398                                        | 24.3   | 4.69   | 258                                  | 22.83  | 5.233             | <b>0.0022</b>         |
| Laboratory results                   | WCC (x10 <sup>9</sup> /L)                       | 545                                        | 8.12   | 4.61   | 337                                  | 8.308  | 4.194             | 0.276                 |
|                                      | Hb (g/L)                                        | 546                                        | 130    | 22.1   | 337                                  | 124.8  | 21.09             | <b>0.0006</b>         |
|                                      | Platelet count (x10 <sup>9</sup> /L)            | 545                                        | 232    | 111    | 337                                  | 230.4  | 95.88             | 0.6622                |
|                                      | Neutrophils (x10 <sup>9</sup> /L)               | 545                                        | 6.28   | 4.18   | 336                                  | 7.472  | 11.98             | 0.0805                |
|                                      | Lymphocytes (x10 <sup>9</sup> /L)               | 545                                        | 1.17   | 1.34   | 335                                  | 1.079  | 0.7064            | 0.8785                |
|                                      | D-dimers (ng/ml)                                | 336                                        | 2556   | 3714   | 218                                  | 3742   | 5305              | <b>0.0096</b>         |
|                                      | Ferritin (ng/mL)                                | 358                                        | 1553   | 2368   | 234                                  | 1751   | 4896              | 0.6944                |
|                                      | Na (mmol/L)                                     | 544                                        | 138    | 7.62   | 337                                  | 136.9  | 5.944             | <b>0.0008</b>         |
|                                      | K (mmol/L)                                      | 524                                        | 4.18   | 0.603  | 320                                  | 4.378  | 0.6716            | <b>&lt;0.0001</b>     |
|                                      | eGFR (mL/min)                                   | 544                                        | 67     | 26.4   | 336                                  | 49.64  | 30.14             | <b>&lt;0.0001</b>     |
|                                      | eGFR pre-COVID19 baseline (mL/min)              | 411                                        | 75.4   | 47.2   | 283                                  | 58.38  | 30.34             | <b>&lt;0.0001</b>     |
|                                      | ALT (U/L)                                       | 494                                        | 46.7   | 113    | 317                                  | 40.54  | 88.75             | 0.0657                |
|                                      | CRP (mg/L)                                      | 527                                        | 106    | 94     | 330                                  | 135.8  | 104.3             | <b>&lt;0.0001</b>     |
|                                      | CK (U/L)                                        | 307                                        | 510    | 1320   | 211                                  | 464.5  | 960.5             | 0.6773                |
|                                      | LDH (U/L)                                       | 293                                        | 480    | 413    | 185                                  | 475.4  | 482.1             | 0.9935                |
|                                      | BNP (pg/mL)                                     | 279                                        | 201    | 754    | 173                                  | 422.4  | 1489              | 0.0688                |
| Procalcitonin (ng/mL)                | 55                                              | 8.96                                       | 49.4   | 27     | 7.774                                | 33.11  | <b>0.0469</b>     |                       |
| HbA1c - most recent (mmol/mol)       | 194                                             | 39.8                                       | 7.14   | 240    | 64.73                                | 21.66  | <b>&lt;0.0001</b> |                       |
| Glucose                              | CBG – at time of COVID19 diagnosis              | 375                                        | 6.97   | 2.07   | 311                                  | 11.43  | 7.145             | <b>&lt;0.0001</b>     |
|                                      | Average CBG in first 72hr of COVID-19 diagnosis | 273                                        | 6.9    | 1.77   | 303                                  | 9.776  | 3.969             | <b>&lt;0.0001</b>     |
| Clinical observations at diagnosis   | Temperature (°C)                                | 537                                        | 37.3   | 1.07   | 333                                  | 37.27  | 1.101             | 0.7922                |
|                                      | Respiratory Rate per Breaths                    | 539                                        | 23.3   | 7.41   | 330                                  | 23.34  | 7.278             | 0.6356                |

|  |                               |     |      |      |     |       |       |               |
|--|-------------------------------|-----|------|------|-----|-------|-------|---------------|
|  | minute)                       |     |      |      |     |       |       |               |
|  | Heart Rate (beats per minute) | 541 | 93   | 19.1 | 332 | 94.72 | 19.24 | 0.256         |
|  | Systolic BP (mmHg)            | 543 | 130  | 24.5 | 334 | 136.1 | 25.99 | <b>0.0011</b> |
|  | Diastolic BP (mmHg)           | 542 | 75.9 | 14.5 | 334 | 73.24 | 14.84 | <b>0.0053</b> |
|  | NEWS at arrival               | 523 | 4.63 | 3.95 | 321 | 4.938 | 3.234 | 0.0515        |

89 Supplementary Table S4: Unadjusted comparisons are shown for patients who had  
90 diabetes mellitus (n=337) and those who did not (n=552). n = number of patients for  
91 whom that data set is available. Note the total number of patients arriving at the  
92 primary outcome was 323. ABG = arterial blood gas, ALT = alanine  
93 aminotransferase, BNP = brain natriuretic peptide, BP = blood pressure, CBG =  
94 capillary blood glucose, CRP = C-reactive protein, CK = creatinine kinase, eGFR =  
95 estimated glomerular filtration rate, FiO2 = fraction of inspired oxygen, Hb =  
96 haemoglobin, HbA1c = glycated haemoglobin, K = potassium, LDH = lactate  
97 dehydrogenase, Na = sodium, NEWS = National Early Warning Score, WCC = white  
98 cell count.

99 SUPPLEMENTARY TABLE S5 - Biochemical Measurements and Clinical  
 100 Observations for 337 patients who had Diabetes Mellitus and were admitted with  
 101 COVID-19, according to whether they met the primary outcome of death or Intensive  
 102 Care Unit admission within 30 days of swab positive diagnosis.

|                                            | Measurement at time of diagnosis                 | Patients with Diabetes who suffered the primary outcome (died/ICU admission within 30 days) (n=149) |        |         | Patients with Diabetes who survived/no ICU admission (n=188) |        |               | p-value (primary outcome vs survived/no ICU) |
|--------------------------------------------|--------------------------------------------------|-----------------------------------------------------------------------------------------------------|--------|---------|--------------------------------------------------------------|--------|---------------|----------------------------------------------|
|                                            |                                                  | n                                                                                                   | mean   | SD      | n                                                            | mean   | SD            |                                              |
| Arterial Blood Gas (ABG) measurement       | FiO <sub>2</sub> recorded on ABG                 | 120                                                                                                 | 48.03  | 26.32   | 140                                                          | 30.36  | 19.83         | <b>&lt;0.0001</b>                            |
|                                            | Lactate (mmol/L)                                 | 120                                                                                                 | 1.868  | 1.608   | 141                                                          | 1.678  | 1.075         | 0.5536                                       |
|                                            | pCO <sub>2</sub> (kPa)                           | 119                                                                                                 | 4.787  | 1.252   | 140                                                          | 5.397  | 4.355         | 0.1177                                       |
|                                            | pO <sub>2</sub> (kPa)                            | 117                                                                                                 | 10.04  | 7.493   | 138                                                          | 7.583  | 4.533         | <b>0.003</b>                                 |
|                                            | Base excess (mmol/L)                             | 118                                                                                                 | -2.86  | 7.946   | 138                                                          | -1.354 | 5.533         | 0.1905                                       |
|                                            | pH                                               | 119                                                                                                 | 7.399  | 0.09554 | 140                                                          | 7.403  | 0.09751       | 0.7566                                       |
|                                            | Bicarbonate (mmol/L)                             | 119                                                                                                 | 22.14  | 5.748   | 139                                                          | 23.42  | 4.689         | 0.0853                                       |
| Laboratory results                         | WCC (x10 <sup>9</sup> /L)                        | 149                                                                                                 | 8.411  | 3.807   | 188                                                          | 8.226  | 4.485         | 0.2624                                       |
|                                            | Hb (g/L)                                         | 149                                                                                                 | 123.4  | 22.92   | 188                                                          | 126    | 19.51         | 0.2594                                       |
|                                            | Platelet count (x10 <sup>9</sup> /L)             | 149                                                                                                 | 211.4  | 84.43   | 188                                                          | 245.4  | 101.8         | <b>0.0011</b>                                |
|                                            | Neutrophils (x10 <sup>9</sup> /L)                | 148                                                                                                 | 7.732  | 9.643   | 188                                                          | 7.267  | 13.56         | <b>0.008</b>                                 |
|                                            | Lymphocytes (x10 <sup>9</sup> /L)                | 147                                                                                                 | 0.9442 | 0.5931  | 188                                                          | 1.184  | 0.7689        | <b>0.0006</b>                                |
|                                            | D-dimers (ng/ml)                                 | 108                                                                                                 | 4703   | 6244    | 110                                                          | 2800   | 3995          | <b>0.0298</b>                                |
|                                            | Ferritin (ng/mL)                                 | 113                                                                                                 | 2230   | 6798    | 121                                                          | 1304   | 1727          | 0.107                                        |
|                                            | Na (mmol/L)                                      | 149                                                                                                 | 137.7  | 6.015   | 188                                                          | 136.3  | 5.834         | <b>0.0346</b>                                |
|                                            | K (mmol/L)                                       | 145                                                                                                 | 4.404  | 0.7085  | 175                                                          | 4.357  | 0.6406        | 0.563                                        |
|                                            | eGFR (mL/min)                                    | 148                                                                                                 | 43.41  | 29.4    | 188                                                          | 54.55  | 29.89         | <b>0.0008</b>                                |
|                                            | ALT (U/L)                                        | 142                                                                                                 | 50.71  | 127.6   | 175                                                          | 32.29  | 30.81         | 0.1423                                       |
|                                            | CRP (mg/L)                                       | 147                                                                                                 | 162.9  | 102     | 183                                                          | 114.1  | 101.3         | <b>&lt;0.0001</b>                            |
|                                            | CK (U/L)                                         | 102                                                                                                 | 716.6  | 1304    | 109                                                          | 228.6  | 296.3         | <b>0.0002</b>                                |
|                                            | LDH (U/L)                                        | 87                                                                                                  | 584    | 658.6   | 98                                                           | 379    | 190.7         | <b>0.0036</b>                                |
|                                            | BNP (pg/mL)                                      | 94                                                                                                  | 570.6  | 1944    | 80                                                           | 248.4  | 592.5         | <b>0.0483</b>                                |
| Procalcitonin (ng/mL)                      | 16                                               | 12.68                                                                                               | 42.85  | 11      | 0.64                                                         | 1.096  | <b>0.0299</b> |                                              |
| HbA <sub>1c</sub> - most recent (mmol/mol) | 99                                               | 63.56                                                                                               | 20.14  | 141     | 65.55                                                        | 22.71  | 0.968         |                                              |
| Glucose                                    | CBG – at time of COVID19 diagnosis               | 140                                                                                                 | 12.28  | 6.537   | 171                                                          | 10.74  | 7.555         | <b>0.0021</b>                                |
|                                            | Average CBG in first 72hr of COVID-19 diagnosis  | 141                                                                                                 | 10.5   | 3.937   | 162                                                          | 9.141  | 3.898         | <b>0.0004</b>                                |
| Clinical observations at diagnosis         | Temperature (°C)                                 | 146                                                                                                 | 37.33  | 1.201   | 187                                                          | 37.22  | 1.018         | 0.3678                                       |
|                                            | Respiratory Rate per minute (Breaths per minute) | 146                                                                                                 | 25.34  | 8.627   | 184                                                          | 21.76  | 5.53          | <b>&lt;0.0001</b>                            |

|                               |     |       |       |     |       |       |                   |
|-------------------------------|-----|-------|-------|-----|-------|-------|-------------------|
| Heart Rate (beats per minute) | 146 | 97.2  | 21.48 | 186 | 92.78 | 17.1  | <b>0.0376</b>     |
| Systolic BP (mmHg)            | 147 | 137.3 | 27.68 | 187 | 135.1 | 24.62 | 0.4514            |
| Diastolic BP (mmHg)           | 147 | 72.5  | 15.78 | 187 | 73.82 | 14.07 | 0.4181            |
| NEWS at arrival               | 142 | 6.07  | 3.37  | 183 | 4.06  | 2.837 | <b>&lt;0.0001</b> |

103 Supplementary Table S5: Unadjusted comparisons are shown for patients with  
 104 diabetes (total n=337) who met the primary outcome (death or ICU admission within  
 105 30 days of diagnosis, n=149) against those who survived and did not have an ICU  
 106 admission (n=188): n = number of patients for whom that data set is available. Note  
 107 the total number of patients arriving at the primary outcome was 323. ABG = arterial  
 108 blood gas, ALT = alanine aminotransferase, BNP = brain natriuretic peptide, BP =  
 109 blood pressure, CBG = capillary blood glucose, CRP = C-reactive protein, CK =  
 110 creatinine kinase, eGFR = estimated glomerular filtration rate, FiO2 = fraction of  
 111 inspired oxygen, Hb = haemoglobin, HbA1c = glycated haemoglobin, K = potassium,  
 112 LDH = lactate dehydrogenase, Na = sodium, NEWS = National Early Warning Score,  
 113 WCC = white cell count.

114 SUPPLEMENTARY TABLE S6 - Multivariate Regression Analysis with SCAD  
 115 sensitivity analysis to determine the important contributing regressors against the  
 116 Primary Outcome of Death/ICU Admission within 30 Days of COVID-19 Diagnosis  
 117 (n=719 patients)

| <i>Regressor</i>                       | <i>Estimate</i> | <i>SE</i> | <i>p-value</i>    | <i>Marginal Effect (%)</i> |
|----------------------------------------|-----------------|-----------|-------------------|----------------------------|
| Age                                    | 0.031           | 0.012     | <b>0.009</b>      | <b>0.5</b>                 |
| Gender                                 | 0.595           | 0.249     | <b>0.017</b>      | <b>10.3</b>                |
| Ischaemic Heart Disease                | 0.002           | 0.017     | 0.893             | 0.04                       |
| Hypertension                           | 0.147           | 0.331     | 0.657             | 2.6                        |
| Antiplatelet drug                      | -0.383          | 0.354     | 0.278             | -6.7                       |
| Clinical Frailty Score                 | 0.147           | 0.072     | <b>0.043</b>      | <b>2.5</b>                 |
| White cell count                       | 0.035           | 0.049     | 0.472             | 0.6                        |
| Haemoglobin                            | -0.009          | 0.014     | 0.528             | -0.2                       |
| Platelets                              | -0.004          | 0.002     | <b>0.038</b>      | <b>-0.1</b>                |
| Neutrophils                            | 0.000           | 0.015     | 0.977             | <0.001                     |
| Serum sodium                           | 0.044           | 0.025     | 0.077             | 0.8                        |
| Serum potassium                        | 0.048           | 0.167     | 0.772             | 0.8                        |
| eGFR on diagnosis                      | -0.008          | 0.011     | 0.460             | -0.1                       |
| C-reactive protein                     | 0.002           | 0.002     | 0.298             | 0.0                        |
| Temperature at diagnosis               | -0.052          | 0.276     | 0.851             | -0.9                       |
| Respiratory rate on diagnosis          | 0.033           | 0.023     | 0.149             | 0.6                        |
| Heart Rate on diagnosis                | 0.006           | 0.008     | 0.427             | 0.1                        |
| Systolic Blood Pressure                | 0.011           | 0.006     | <b>0.041</b>      | <b>0.2</b>                 |
| Diastolic Blood Pressure               | -0.004          | 0.010     | 0.657             | -0.1                       |
| NEWS at diagnosis                      | -0.004          | 0.080     | 0.959             | -0.1                       |
| Inspired Oxygen delivered at diagnosis | -0.013          | 0.007     | 0.087             | -0.2                       |
| Oxygen saturations at diagnosis        | -0.035          | 0.030     | 0.236             | -0.6                       |
| Maximum inspired oxygen required       | 0.067           | 0.005     | <b>&lt;0.0001</b> | <b>1.2</b>                 |

118 Supplementary Table S6: Unselected multivariate logistic (Logit) analysis of all  
 119 variables that were collected for patients admitted with swab positive COVID 19 with  
 120 the primary outcome of death or ICU admission within 30 days (719 patients) – that  
 121 data is shown in Table 1. Thereafter a sensitivity analysis was performed to select  
 122 the truly important variables in our regression. We used a Smoothly Clipped  
 123 Absolute Deviation (SCAD) regularised regression technique which delivered 23  
 124 variables independently selected to be the most important drivers of the model, and  
 125 new p-values are recreated to adjust for this analysis. Refer to Table 1 for details on  
 126 the other statistical measures presented. eGFR = estimated glomerular filtration rate,  
 127 NEWS = National Early Warning Score.

128 SUPPLEMENTARY TABLE S7 - Multivariate Regression Analysis with SCAD  
 129 sensitivity analysis to determine the important contributing regressors against the  
 130 Primary Outcome of Death/ICU Admission within 30 Days of COVID-19 Diagnosis in  
 131 Patients with Diabetes Mellitus (n=268 patients)

| <i>Regressor</i>                       | <i>Estimate</i> | <i>SE</i> | <i>p-value</i>    | <i>Marginal Effect (%)</i> |
|----------------------------------------|-----------------|-----------|-------------------|----------------------------|
| Age                                    | 0.041           | 0.017     | <b>0.016</b>      | <b>0.9</b>                 |
| Gender                                 | 0.024           | 0.105     | 0.822             | 0.5                        |
| White cell count                       | -0.001          | 0.027     | 0.970             | 0.0                        |
| Haemoglobin                            | -0.012          | 0.011     | 0.265             | -0.3                       |
| Platelets                              | -0.007          | 0.003     | <b>0.008</b>      | <b>-0.2</b>                |
| Neutrophils                            | 0.000           | 0.006     | 0.971             | 0.0                        |
| Serum sodium                           | 0.000           | 0.008     | 0.982             | 0.0                        |
| eGFR on diagnosis                      | -0.008          | 0.007     | 0.236             | -0.2                       |
| C-reactive protein                     | 0.000           | 0.002     | 0.836             | 0.0                        |
| Capillary blood glucose on diagnosis   | 0.024           | 0.030     | 0.422             | 0.6                        |
| Temperature on diagnosis               | -0.017          | 0.077     | 0.824             | -0.4                       |
| Respiratory rate on diagnosis          | 0.040           | 0.031     | 0.196             | 0.9                        |
| Heart rate on diagnosis                | -0.004          | 0.010     | 0.682             | -0.1                       |
| Systolic blood pressure                | 0.004           | 0.011     | 0.713             | 0.1                        |
| Diastolic blood pressure               | 0.006           | 0.022     | 0.800             | 0.1                        |
| Inspired oxygen delivered at diagnosis | 0.003           | 0.012     | 0.773             | 0.1                        |
| Oxygen saturations at diagnosis        | -0.005          | 0.047     | 0.908             | -0.1                       |
| Maximum inspired oxygen required       | 0.057           | 0.008     | <b>&lt;0.0001</b> | <b>1.3</b>                 |

132 Supplementary Table S7: Unselected multivariate logistic (Logit) analysis of all  
 133 variables that were collected for patients admitted with swab positive COVID 19 who  
 134 had diabetes mellitus, as applied to the primary outcome of death or ICU admission  
 135 within 30 days (268 patients) – that data is shown in Table 2. Thereafter a sensitivity  
 136 analysis was performed to select the truly important variables in our regression. We  
 137 used a Smoothly Clipped Absolute Deviation (SCAD) regularised regression  
 138 technique which delivered 19 variables independently selected to be the most  
 139 important drivers of the model, and new p-values are recreated to adjust for this  
 140 analysis. Refer to Table 1 for details on the other statistical measures presented.  
 141 eGFR = estimated glomerular filtration rate.

142 Supplementary References

- 143 1. Tibshirani, R., *Regression Shrinkage and Selection via the Lasso*. Journal of the Royal  
144 Statistical Society. Series B (Methodological), 1996. **58**(1): p. 267-288.
- 145 2. Tibshirani, R., *The lasso method for variable selection in the Cox model*. Stat Med, 1997.  
146 **16**(4): p. 385-95.
- 147 3. Yengo, L., et al., *Impact of statistical models on the prediction of type 2 diabetes using non-*  
148 *targeted metabolomics profiling*. Mol Metab, 2016. **5**(10): p. 918-925.
- 149 4. Hastie, T., R. Tibshirani, and R. Tibshirani, *Best Subset, Forward Stepwise, or Lasso? Analysis*  
150 *and Recommendations Based on Extensive Comparisons*. Preprint at  
151 <https://arxiv.org/abs/1707.08692>, 2020.
- 152 5. Fan, J. and R. Li, *Variable selection via nonconcave penalized likelihood and its oracle*  
153 *properties*. Journal of the American Statistical Association, 2001. **96**(456): p. 1348-1360.
